# Supplementary material
Source: PubMed Central journal article supplement (PMC9809269)
Supplement: NIHMS1848031-supplement-1.pdf [file NIHMS1848031-supplement-1.pdf]

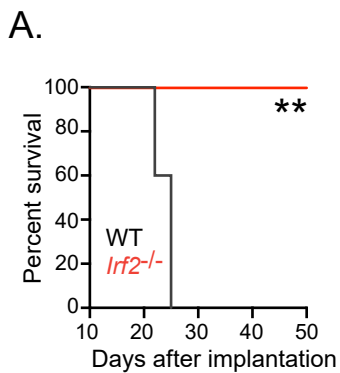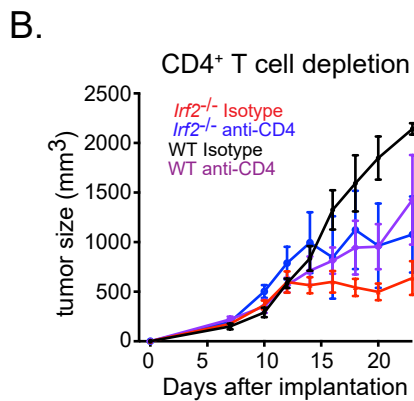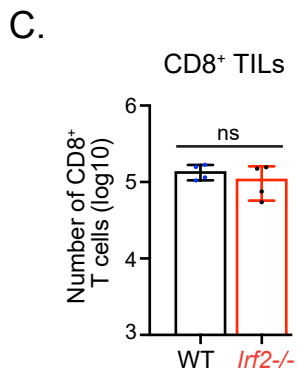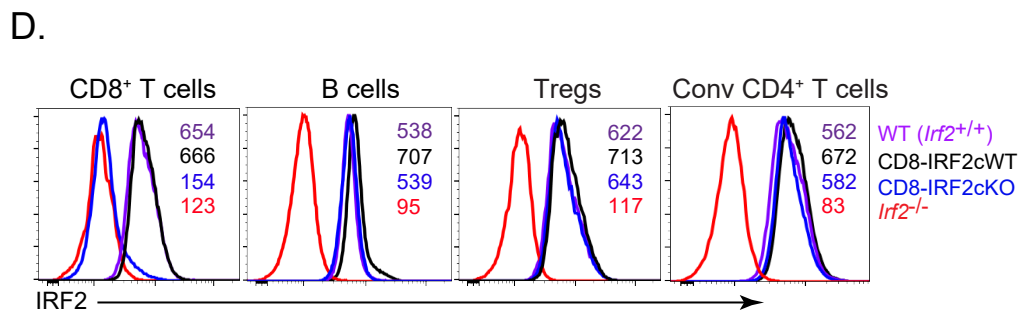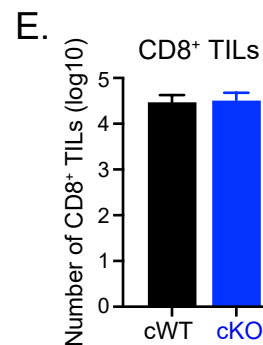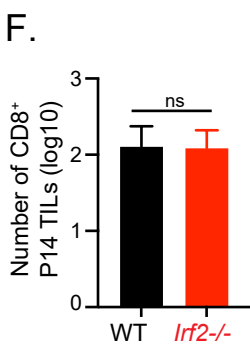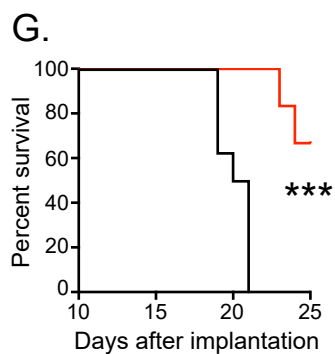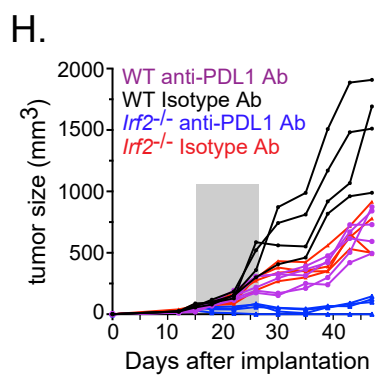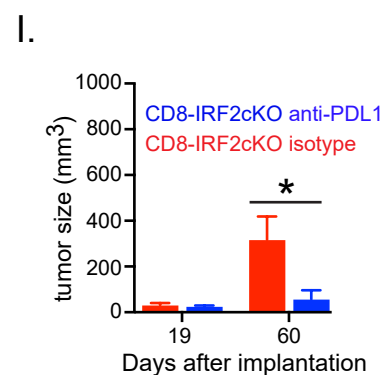

**Figure S1. Tumor growth, IRF2 expression and immunotherapy in WT and *Irf2*<sup>-/-</sup> mice**, Related to Figures 1 and 2.

- (A) Graph showing survival kinetics of WT (black) and *Irf2*<sup>-/-</sup> (red) mice implanted with MC38 tumors.
- (B) Tumor growth kinetics in WT or *Irf2*<sup>-/-</sup> mice that received isotype control or anti-CD4 depleting antibody one day before MC38 tumor implantation.
- (C) Graph shows the number of WT and *Irf2*<sup>-/-</sup>CD8<sup>+</sup> TILs from mice implanted with MC38 tumors.
- (D) Flow plots show level of IRF2 expression in various immune cells from spleens of WT control (purple), CD8-IRF2cWT (IRF2 sufficient mice, black), CD8-IRF2cKO (IRF2-deficient only in CD8<sup>+</sup> T cells, blue) and *Irf2*<sup>-/-</sup> (red) mice upon completion of a tumor kinetic study.
- (E) Graph showing the number of CD8-IRF2cWT (WT) and CD8-IRF2cKO (cKO) CD8<sup>+</sup> TILs from mice implanted with MC38 tumors.
- (F) Graph depicting the number of tumor-specific (P14s) WT and *Irf2*<sup>-/-</sup>CD8<sup>+</sup> TILs from mice implanted with MC38 tumors.
- (G) Graph showing survival kinetics of WT and *Irf2*<sup>-/-</sup> mice implanted with MC38 tumors.
- (H) Individual mouse tumor growth kinetics in WT or *Irf2*<sup>-/-</sup> mice with orthotopic PyMT breast tumor cells that were treated with isotype or anti-PDL1 blocking antibody beginning on day 15 after tumor implantation.
- (I) Tumor growth kinetics in CD8-IRF2cKO mice with orthotopic PyMT breast tumor cells that were treated with isotype or anti-PDL1 blocking antibody beginning on day 19 after implantation.

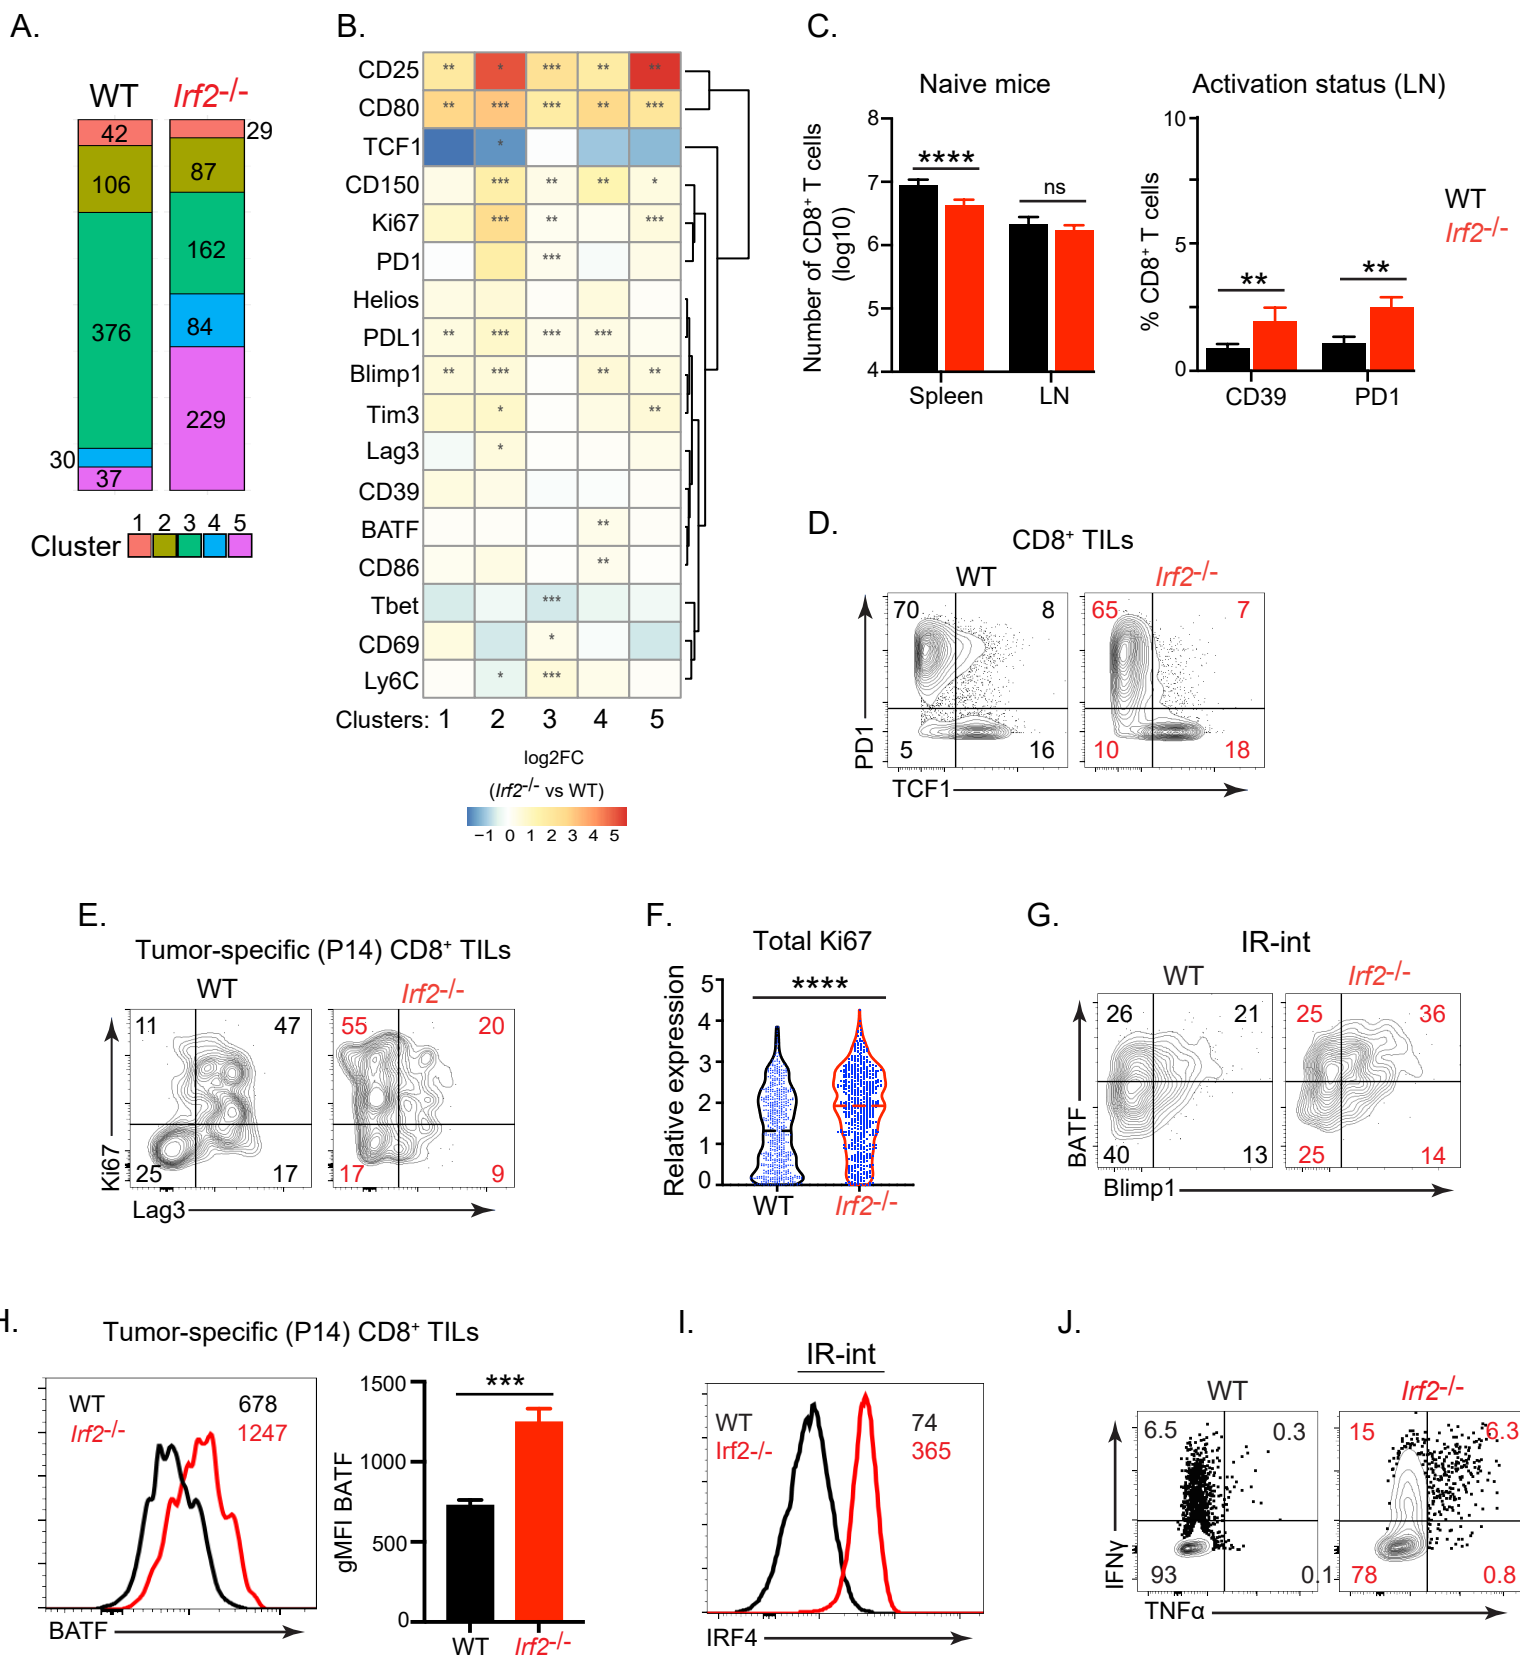

**Figure S2. Immune inhibitory and stimulatory protein expression in WT and *Irf2*<sup>-/-</sup> CD8<sup>+</sup> TILs**, Related to Figure 3.

**(A)** Bar graph depicts the number of MC38-infiltrating CD8<sup>+</sup> T cells in each cluster in their respective WT and *Irf2*<sup>-/-</sup> groups. A total of 591 cells were analyzed in each group.

**(B)** Heatmap depicting log2FoldChange (*Irf2*<sup>-/-</sup> vs WT) of differentially expressed proteins between the WT and *Irf2*<sup>-/-</sup> CD8<sup>+</sup> TILs within the same cluster. Red indicates increased in *Irf2*<sup>-/-</sup> and blue indicates increased in WT.

**(C)** The graphs indicated the number of naïve CD8<sup>+</sup> T cells from the spleens and lymph nodes (LN) of WT and *Irf2*<sup>-/-</sup> mice, as well as the proportions of dLN CD8<sup>+</sup> T cells expressing the indicated protein markers of immune activation.

**(D)** Flow plots indicating PD1 and TCF1 expression in WT and *Irf2*<sup>-/-</sup>CD8<sup>+</sup> TILs.

**(E)** Flow plots indicating Ki67 and Lag3 expression in tumor-specific (P14) WT and *Irf2*<sup>-/-</sup>CD8<sup>+</sup> TILs.

**(F)** Violin plot showing total Ki67 expression in WT and *Irf2*<sup>-/-</sup>CD8<sup>+</sup> TILs. Each blue dot represents a single cell.

**(G)** CyTOF plot showing BATF and Blimp1 expression by IR-int WT and *Irf2*<sup>-/-</sup> CD8<sup>+</sup> T cells. The numbers in the plots indicate the percent of cells in each quadrant.

**(H)** Histogram showing BATF expression tumor-specific (P14) WT (black) and *Irf2*<sup>-/-</sup> (red) CD8<sup>+</sup> TILs. The numbers in the histograms show the gMFI of BATF expression. The graph summarizes gMFI of BATF expression of tumor-specific CD8<sup>+</sup> TILs from five mice.

**(I)** Histogram showing IRF4 expression by IR-int WT (black) and *Irf2*<sup>-/-</sup> (red) CD8<sup>+</sup> TILs. The numbers in the histograms show the gMFI of IRF4 expression.

**(J)** Flow plots indicating IFN $\gamma$  and TNF $\alpha$  co-expression in GP<sub>33-41</sub> peptide stimulated WT and *Irf2*<sup>-/-</sup>CD8<sup>+</sup> TILs. The numbers in the plots show the percent of cells in each quadrant.

Data are representative of at least three independent experiments. In each experiment, tumors from 4 – 7 mice were pooled from each group (WT or *Irf2*<sup>-/-</sup>) in order to obtain sufficient numbers of CD8<sup>+</sup> TILs for analysis. \* p<0.05, \*\* p<0.01, \*\*\* p<0.001, \*\*\*\* p< 0.0001.

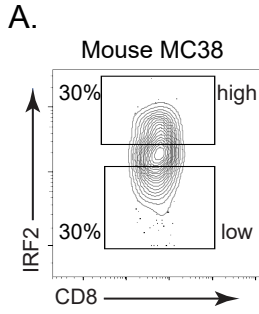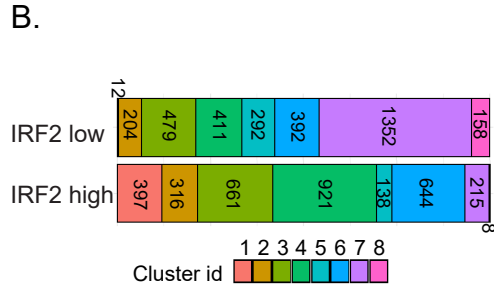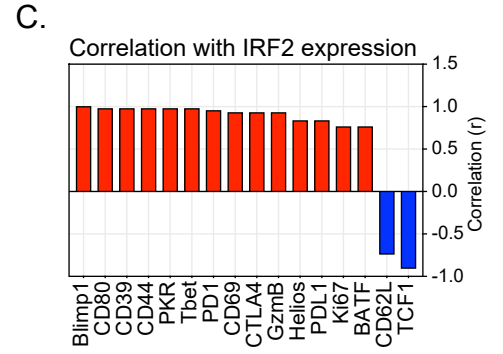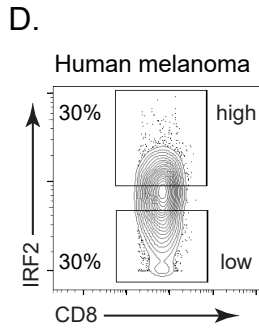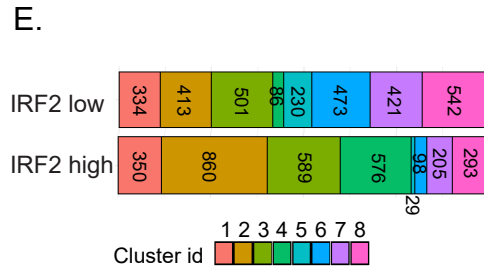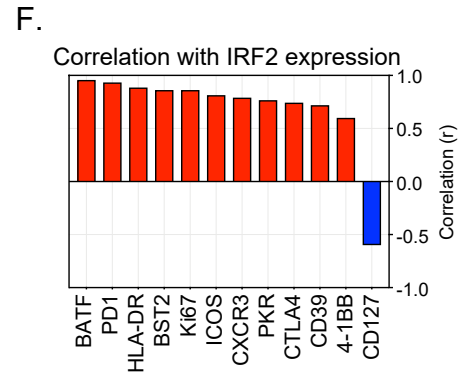

**Figure S3. IRF2 relationship to activation and IFN stimulated genes, Related to Figure 4.**

**(A)** Bar graph depicts the number of MC38-infiltrating CD8<sup>+</sup> T cells in each cluster in their respective IRF2 high and IRF2 low groups. A total of 3300 cells were analyzed in each group.

**(B)** CyTOF plot showing gating of IRF2 high and IRF2 low fractions in MC38 CD8<sup>+</sup> TILs .

**(C)** Bar plots show Spearman correlation (r) of IRF2 with the indicated protein in MC38-infiltrating CD8<sup>+</sup> T cells

**(D)** Bar graph depicts the number of human melanoma-infiltrating CD8<sup>+</sup> T cells in each cluster in their respective IRF2 high and IRF2 low groups. A total of 3000 cells were analyzed in each group.

**(E)** CyTOF plot showing gating of IRF2 high and IRF2 low fractions in human melanoma CD8<sup>+</sup> TILs . The flow plots show one representative tumor from the five melanoma samples.

**(F)** Bar plots show Spearman correlation (r) of IRF2 with the indicated protein in human melanoma CD8<sup>+</sup> TILs.

A.

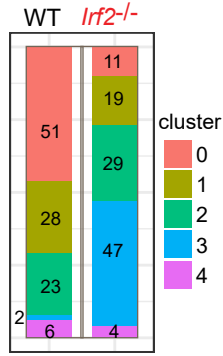

B.

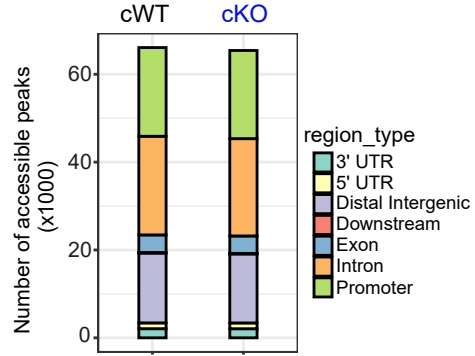

C.

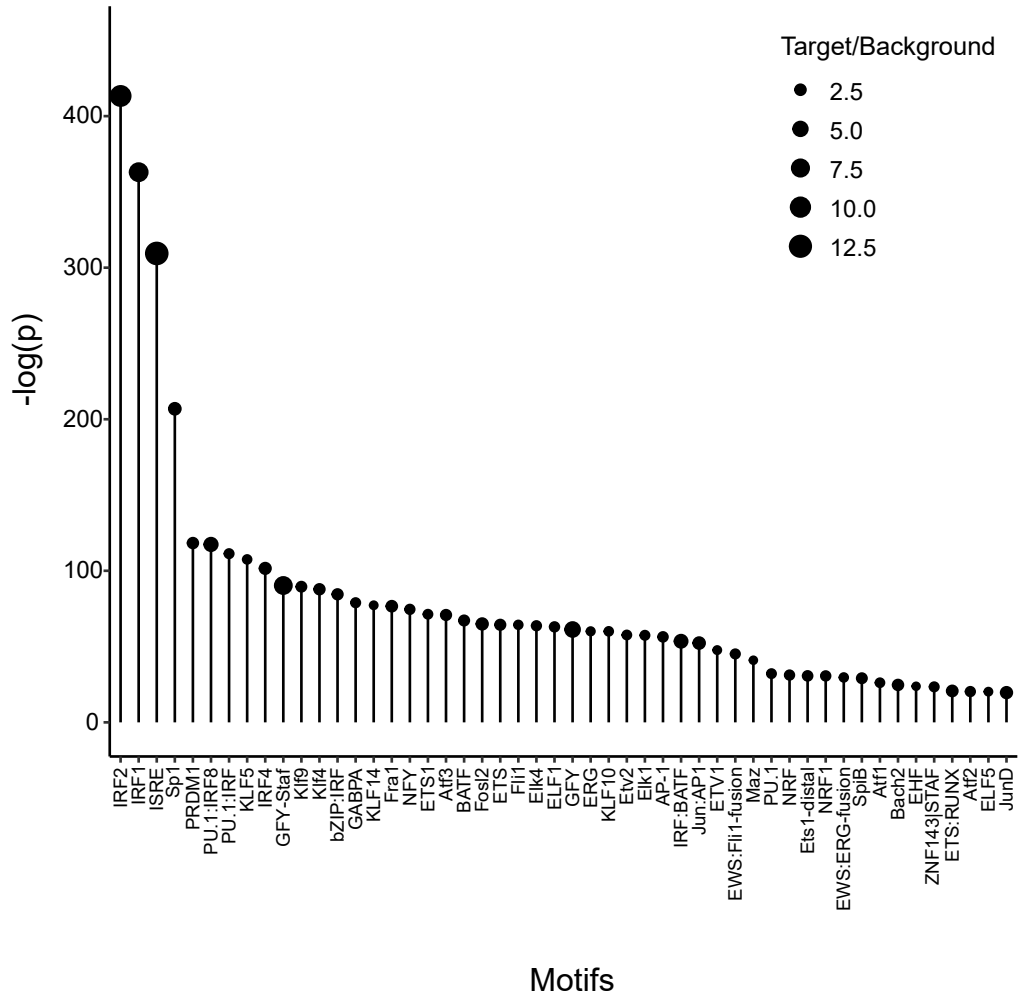

**Figure S4. Transcriptional and epigenetic analysis of CD8<sup>+</sup> TILs**, Related to Figure 5.

**(A)** Bar graph depicts the number of MC38-infiltrating CD8<sup>+</sup> T cells in each cluster in their respective WT and *Irf2*<sup>-/-</sup> groups. A total of 679 cells were used in the scRNA-seq data analysis. Data representation is downsampled to 110 cells for each group.

**(B)** Bar graph depicting the number of accessible peaks in each indicated region of CD8-IRF2cWT (WT) and CD8-IRF2cKO (cKO) CD8<sup>+</sup> TILs.

**(C)** Top transcription factor motifs enriched in IRF2 target peaks as determined by HOMER motif analysis. Target/Background is the enrichment of motifs in the target peaks divided by the enrichment of those motifs in a random Homer simulated *k*-mer background; i.e., the number of target-peaks that have the indicated motif divided by the number of background-peaks that have the same motif.
